# Supplementary material for: Colorectal cancer liver metastatic growth depends on PAD4-driven citrullination of the extracellular matrix
Source: PubMed Central journal article supplement (PMC6235861; doi:10.1038/s41467-018-07306-7), 2018-11-14
Supplement: 41467_2018_7306_MOESM1_ESM.pdf [file 41467_2018_7306_MOESM1_ESM.pdf]

# Supplementary Information

to

Colorectal cancer liver metastatic growth depends on PAD4-driven  
citrullination of the extracellular matrix

by Yuzhalin et al.

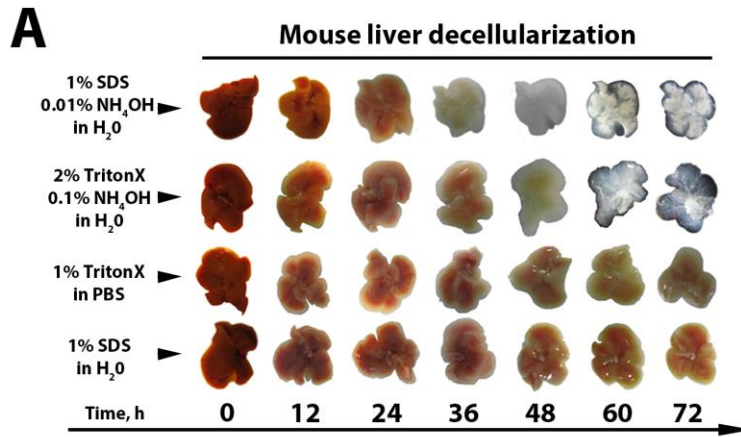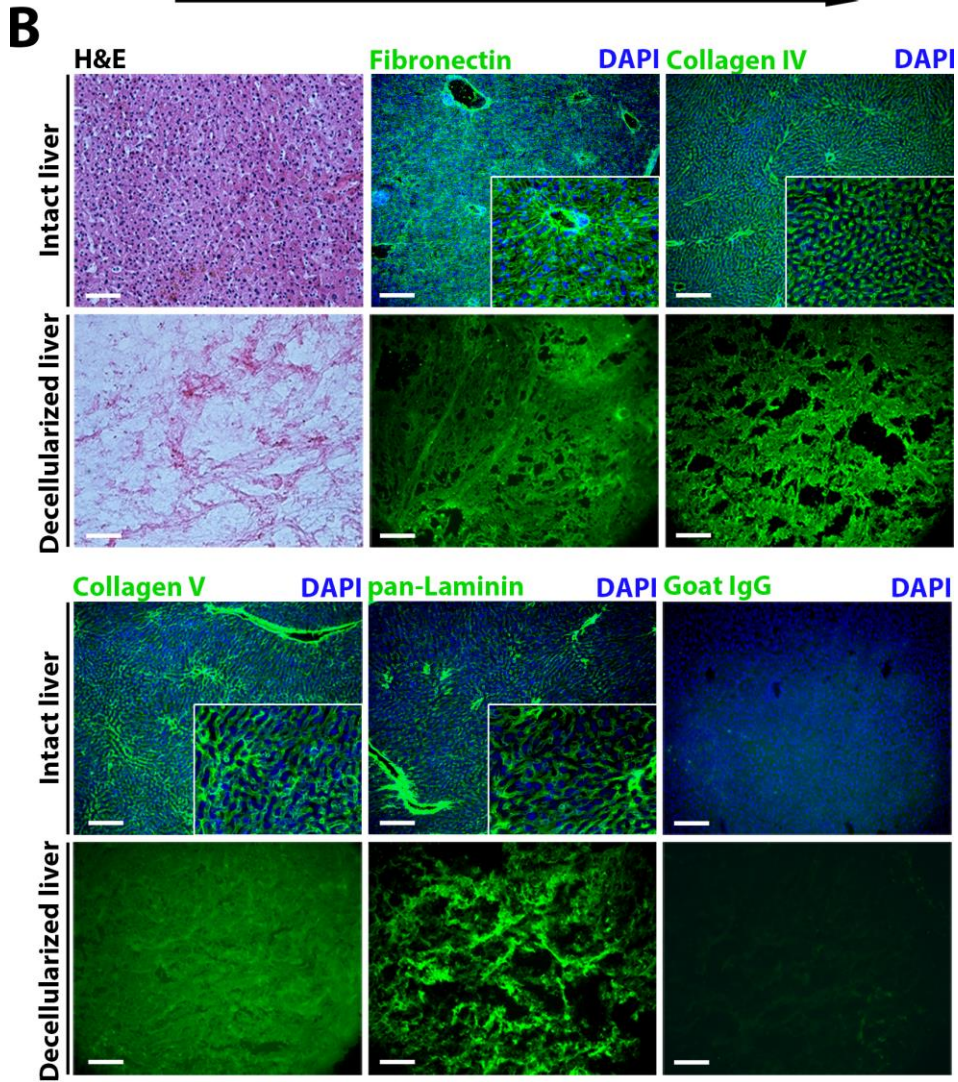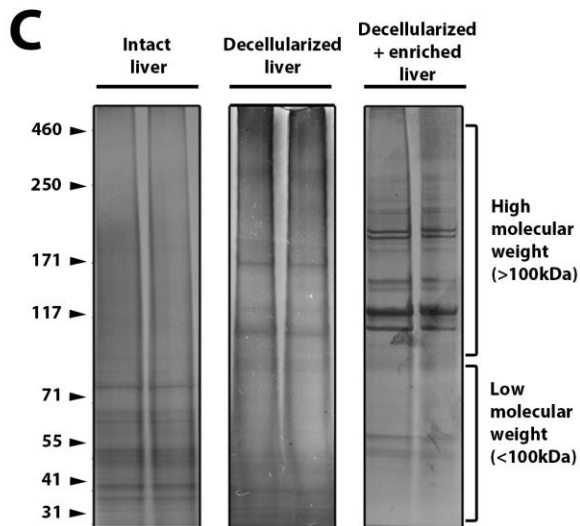

Supplementary Figure 1. Optimization of ECM isolation. **A.** Representative images of mouse livers decellularized by the indicated solutions after indicated times **B.** Intact or decellularized mouse livers were stained with H&E or by immunohistochemistry for the indicated ECM proteins. Isotype control staining was performed using goat IgG. Scale bar = 100  $\mu\text{m}$ . **C.** Total protein extracted from intact (left), decellularized (middle), and decellularized and biochemically enriched (right) mouse livers was resolved by SDS-PAGE and silver stained. High and low molecular weight areas were considered  $>100$  kDa and  $<100$  kDa, respectively. Experiments were performed in parallel in duplicate. H – hours. H&E – hematoxylin and eosin, PBS – phosphate-buffered saline.

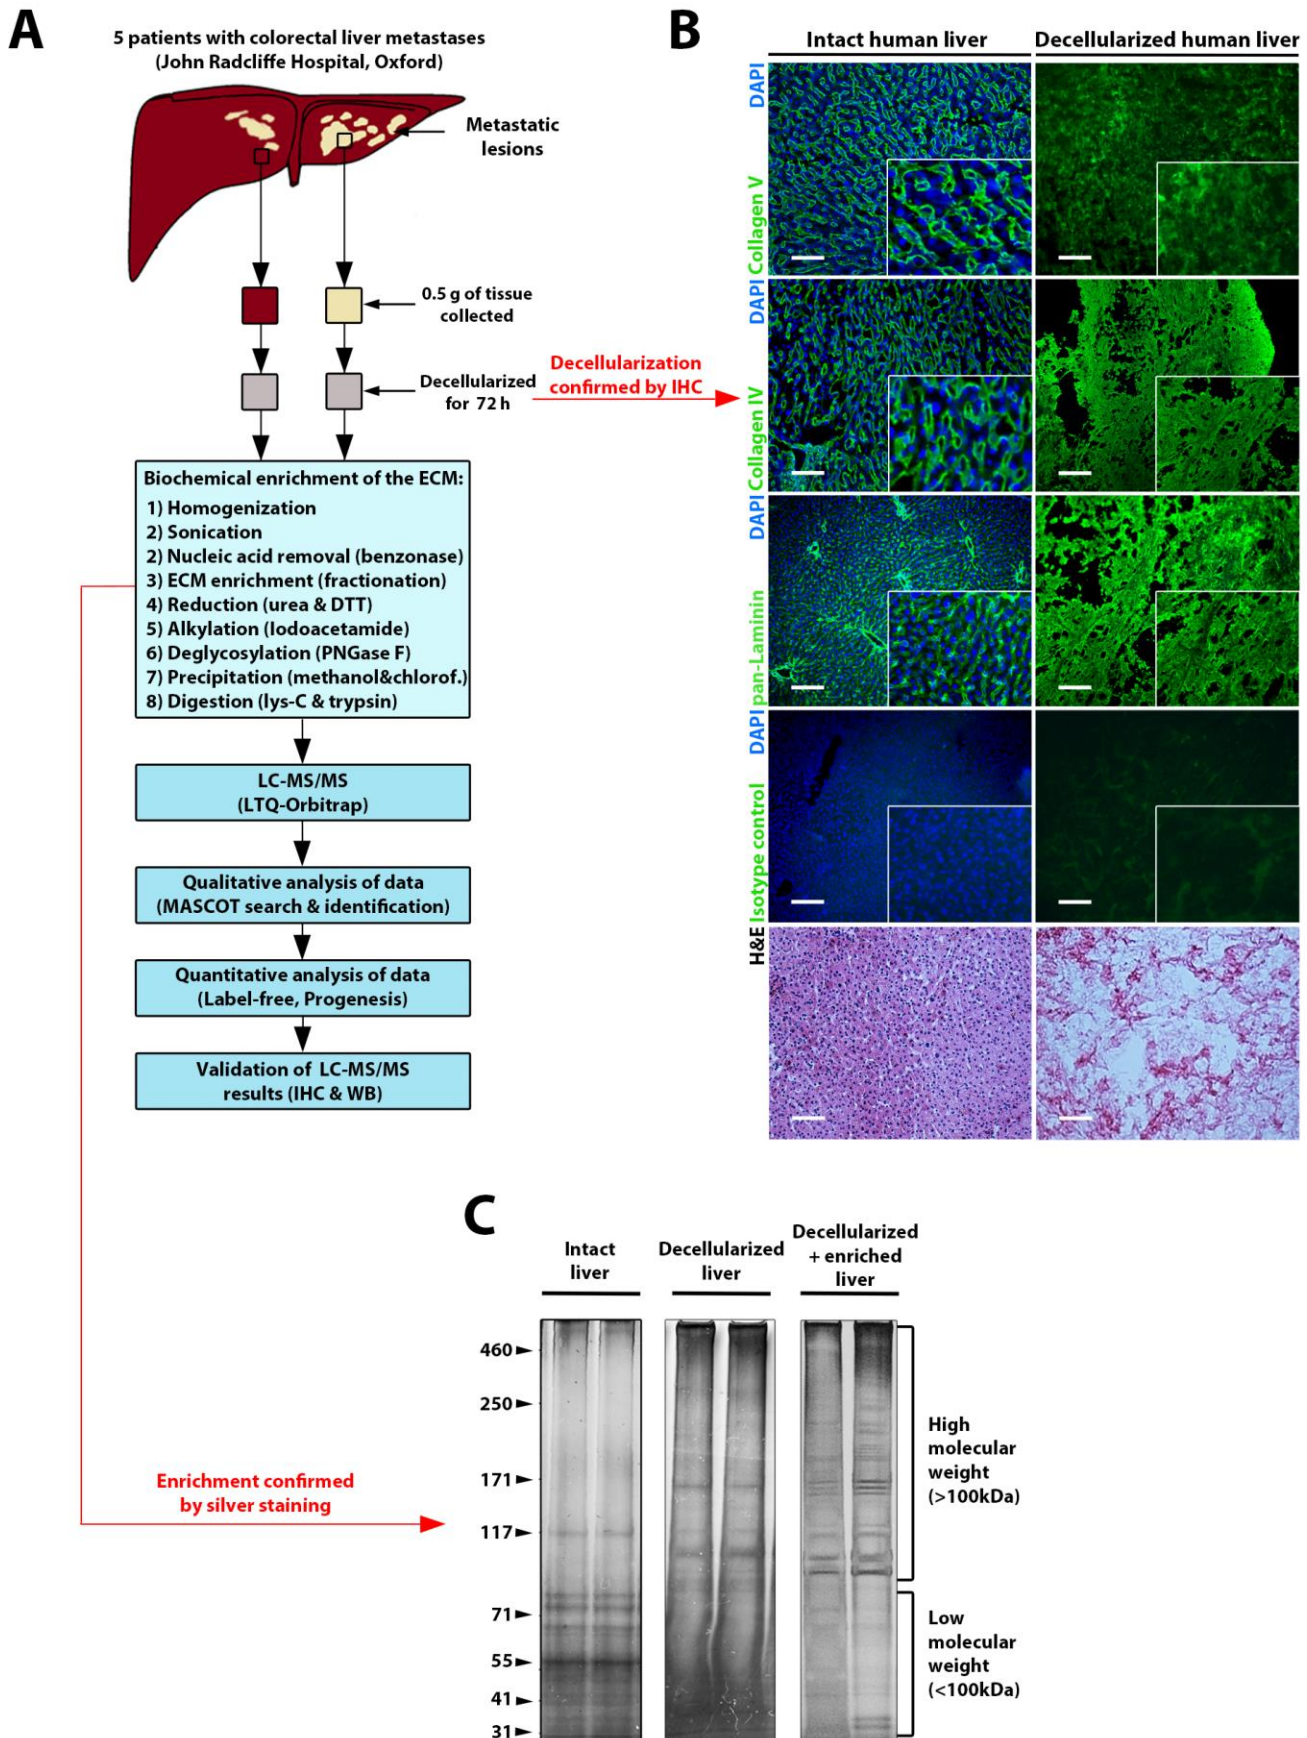

Supplementary Figure 2. Study design and preparation of human ECM-enriched decellularized matrices of CRC hepatic metastases and adjacent unaffected livers. **A**. Study pipeline describing ECM enrichment protocol and proteomics analysis. **B**. Human normal liver tissues, decellularized or intact, were stained for the indicated proteins, isotype control antibody, or with H&E. Scale bar = 100  $\mu$ m. **C**. Total protein extracted from intact (left), decellularized (middle), and decellularized and biochemically enriched (right) human liver tissue adjacent to metastasis was resolved by SDS-PAGE and silver stained. High and low molecular weight areas were considered >100 kDa and <100 kDa, respectively. Experiments were performed in parallel in duplicate.

IHC – immunohistochemistry, WB – western blotting. LC-MS/MS – liquid chromatography–mass spectrometry, DTT – dithiothreitol. H&E – hematoxylin and eosin, h – hours.

**A**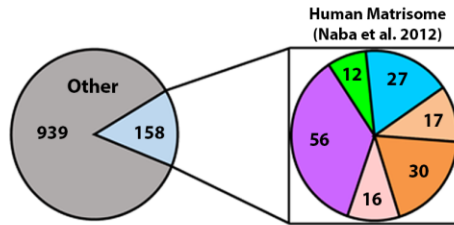**B**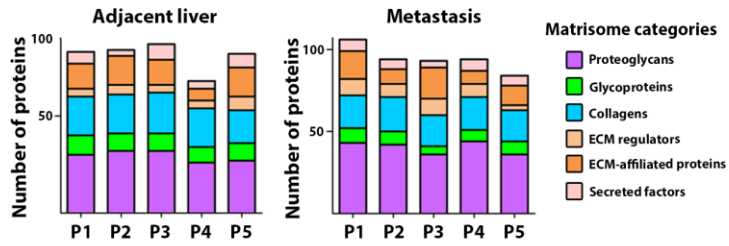**C**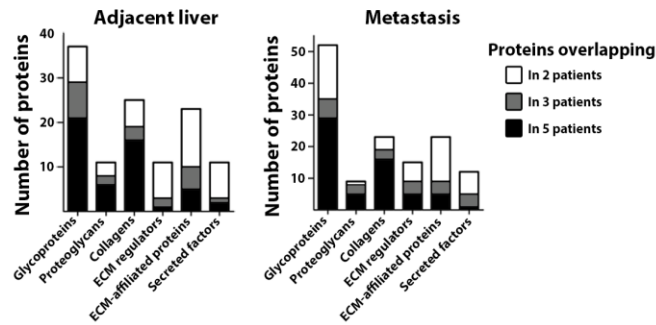**D**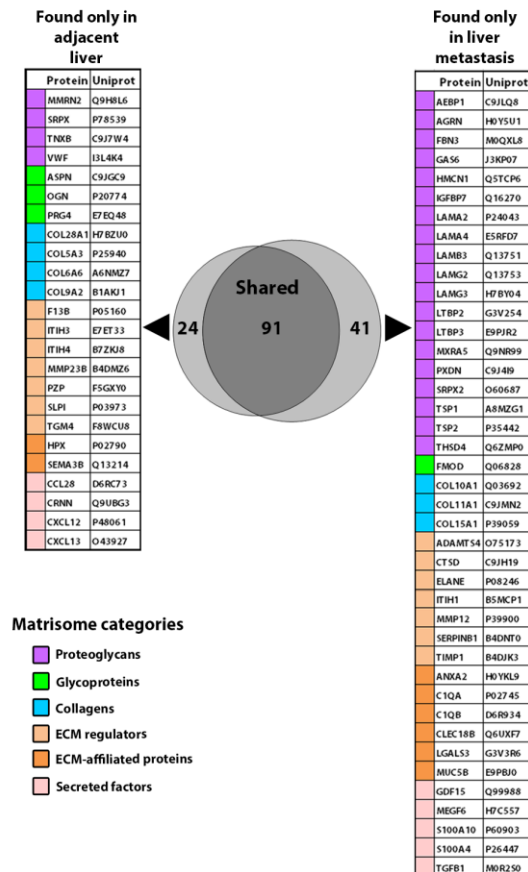**E**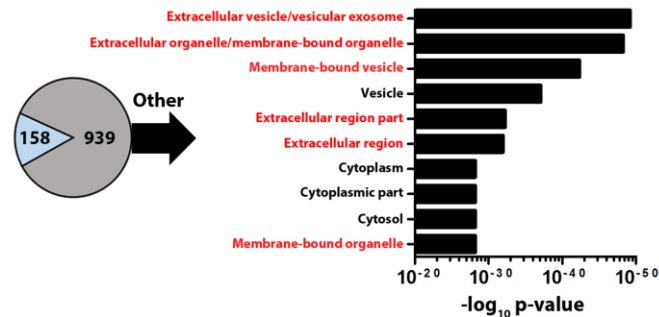

Supplementary Figure 3. Characterization of the matrisome of human CRC hepatic metastases by qualitative proteomics. **A.** Decellularized and ECM-enriched fractions obtained from human CRC hepatic metastases and paired adjacent unaffected liver tissues ( $n=5$  per group) were analyzed by LC-MS/MS. Left pie chart displays the total number of proteins identified by MASCOT search in at least 1 individual sample and by at least 2 peptides. Right pie chart displays proteins identified as the ECM in accordance with categorization by Naba et al.<sup>13</sup> **B.** Bar graphs show inter-sample proteomics variability between individual samples in metastasis and adjacent liver groups within each ECM category. **C.** Bar graphs show the overlap of identified proteins in individual patients across ECM categories **D.** Lists of matrisome proteins identified exclusively in metastasis (right) or adjacent liver groups (left) in at least 1 patient. **E.** Proteins categorized as non-ECM proteins were processed through Panther Gene Ontology (GO) enrichment analysis. Top 10 enriched GO categories are shown. ECM-related GO categories are highlighted in red. P – patient, ECM – extracellular matrix.

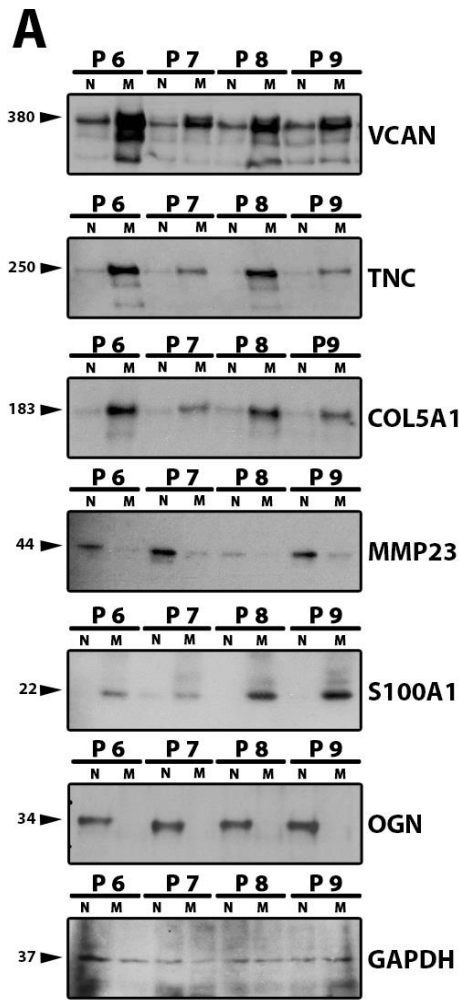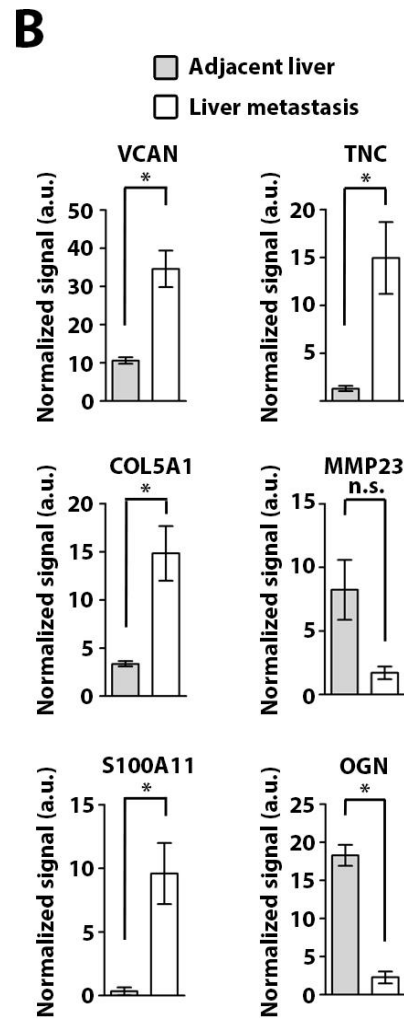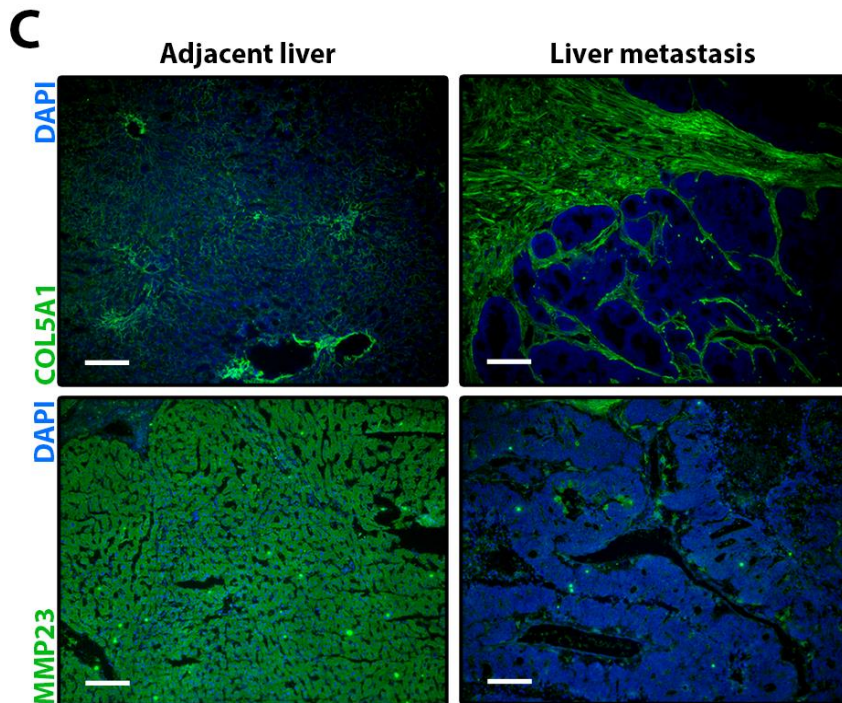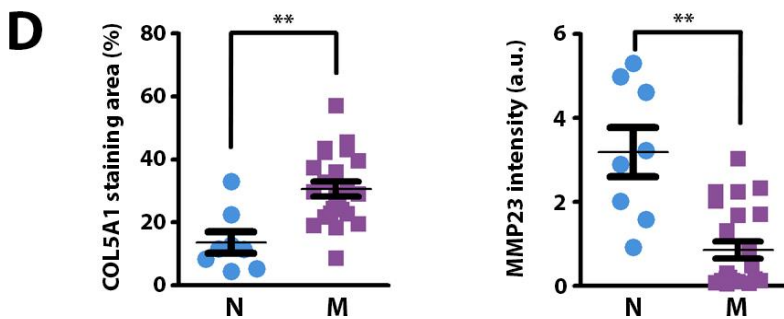



Supplementary Figure 4. Validation of proteomics results. **A.** Tissue lysates extracted from a different set of human CRC hepatic metastases and paired adjacent unaffected liver tissues ( $n=4$  per group) were immunoblotted for the indicated ECM proteins. GAPDH was used as a loading control. **B.** Densitometry analysis of protein bands detected in **A.** Densitometry was normalized to GAPDH. **C.** Representative images of COL5A1 and MMP-23 staining of 23 CRC liver metastasis tissues (right) and 8 non-matched adjacent unaffected liver tissues (left). Scale bar = 100  $\mu\text{m}$ . **D.** Quantification of COL5A1 staining area and MMP-23 intensity from the experiment in **C.** For **B**, error bars indicate s.e.m. ( $*P < 0.05$ , n.s. = non-significant, Wilcoxon signed rank test). For **D**, error bars indicate s.e.m. ( $**P < 0.01$ , Mann-Whitney U test). P – patient. N – adjacent unaffected liver, M – metastasis.

**A****Identification of citrullinated peptides using PEAKS® software:**

R.C(+57.02)D(-18.01)**R(+.98)**NLVWNAGALHYSDEVEIIQGLTR.M  
 R.NFTAADWGQ**SR(+.98)**DAEEAISQTIDTIVDMIK.N  
 K.**GYR(+.98)**GPE(+57.02)GPQ(+.98)GPPGHQGGPPGDEC(+57.02)EILDIIMK.M  
 K.**GYR(+.98)**GPE(+57.02)GPQGGPPGHQ(+.98)GPPGDEC(+57.02)EILDIIMK.M  
 K.G(+57.02)**YR(+.98)**GPEGPQ(+.98)GPPGHQGGPPGDEC(+57.02)EILDIIMK.M

**COL6A1 peptides  
(Patient 5,  
metastasis)**

**R(+.98) = Citrullinated arginine residue**

**B****Citrullinated in adjacent liver only**

| Category         | Protein   | Uniprot | Citrullinated peptides |            |
|------------------|-----------|---------|------------------------|------------|
|                  |           |         | Adjacent liver         | Metastasis |
| Proteoglycans    | HSPG2     | P98160  | 7                      | 0          |
| Collagens        | COL6A2    | P12110  | 3                      | 0          |
| ECM regulators   | TGM2      | P21980  | 2                      | 0          |
| Glycoproteins    | ELN       | P15502  | 1                      | 0          |
| Glycoproteins    | LAMB2     | P55268  | 1                      | 0          |
| Collagens        | COL5A1    | P20908  | 1                      | 0          |
| Collagens        | COL22A1   | Q8NFW1  | 1                      | 0          |
| Collagens        | COL6A6    | A6NMZ7  | 1                      | 0          |
| ECM regulators   | KRT6A     | P02538  | 1                      | 0          |
| ECM regulators   | MTHFD1    | P11586  | 1                      | 0          |
| Secreted factors | ZNF469    | Q96JG9  | 1                      | 0          |
| Other            | DSEL      | Q8IZU8  | 1                      | 0          |
| Other            | TUFM      | P49411  | 1                      | 0          |
| Other            | SYNCRIP   | O60506  | 1                      | 0          |
| Other            | HNRNPA2B1 | P22626  | 1                      | 0          |
| Other            | IGHA1     | P01876  | 1                      | 0          |
| Other            | PCBP4     | P57723  | 1                      | 0          |
| Other            | FRYL      | O94915  | 1                      | 0          |
| Other            | SEC24D    | O94855  | 1                      | 0          |
| Other            | ALB       | P02768  | 1                      | 0          |
| Other            | MYO1A     | Q9UBCS  | 1                      | 0          |

**Citrullinated in both**

| Category       | Gene name | Uniprot | Citrullinated peptides |            |
|----------------|-----------|---------|------------------------|------------|
|                |           |         | Adjacent liver         | Metastasis |
| ECM regulators | FBN1      | P35555  | 8                      | 23         |
| ECM regulators | EMILIN1   | Q9Y6C2  | 4                      | 11         |
| Collagens      | COL1A1    | P02452  | 6                      | 10         |
| Collagens      | COL6A1    | P12109  | 7                      | 9          |
| Glycoproteins  | FN1       | P02751  | 4                      | 8          |
| Collagens      | COL1A2    | P08123  | 6                      | 6          |
| Collagens      | COL4A2    | P08572  | 2                      | 5          |
| Collagens      | COL4A1    | P02462  | 1                      | 5          |
| ECM regulators | COL2A1    | P02458  | 6                      | 4          |
| Other          | VTN       | P04004  | 3                      | 3          |
| Collagens      | COL5A2    | P05997  | 2                      | 3          |
| Glycoproteins  | FGA       | P02671  | 1                      | 3          |
| Collagens      | COL6A3    | P12111  | 4                      | 2          |
| Glycoproteins  | FGB       | P02675  | 3                      | 2          |
| ECM regulators | TNC       | P24821  | 3                      | 2          |
| Other          | FUS       | P35637  | 3                      | 2          |
| Collagens      | COL3A1    | P02461  | 2                      | 2          |
| Glycoproteins  | LAMG1     | P11047  | 1                      | 2          |
| Other          | EEF1A1    | P68104  | 1                      | 2          |
| Glycoproteins  | FGG       | P02679  | 1                      | 1          |
| Glycoproteins  | TGFBI     | Q15582  | 1                      | 1          |

**Citrullinated in metastases only**

| Category       | Gene name | Uniprot | Citrullinated peptides |            |
|----------------|-----------|---------|------------------------|------------|
|                |           |         | Adjacent liver         | Metastasis |
| Other          | ACTB      | P60709  | 0                      | 5          |
| Other          | ACTA1     | P68133  | 0                      | 3          |
| Other          | PFN1      | P07737  | 0                      | 3          |
| Collagens      | COL8A1    | P27658  | 0                      | 2          |
| Collagens      | COL11A1   | P12107  | 0                      | 2          |
| Other          | REV3L     | O60673  | 0                      | 2          |
| Other          | HNRNPU    | Q00839  | 0                      | 2          |
| Glycoproteins  | EFEMP1    | Q12805  | 0                      | 1          |
| Glycoproteins  | EMILIN2   | Q9BXX0  | 0                      | 1          |
| Glycoproteins  | FBLN5     | Q9UBX5  | 0                      | 1          |
| Glycoproteins  | LTBP2     | Q14767  | 0                      | 1          |
| Glycoproteins  | NID2      | Q14112  | 0                      | 1          |
| ECM regulators | ELANE     | P08246  | 0                      | 1          |
| ECM regulators | MUC2      | Q02817  | 0                      | 1          |
| ECM regulators | KRT7      | P08729  | 0                      | 1          |
| Other          | PFKL      | P17858  | 0                      | 1          |
| Other          | DBNL      | Q9UJU6  | 0                      | 1          |
| Other          | HSPB1     | P04792  | 0                      | 1          |
| Other          | HSP90AA1  | P07900  | 0                      | 1          |
| Other          | OLFM4     | Q6UX06  | 0                      | 1          |
| Other          | PABPC3    | Q9H361  | 0                      | 1          |
| Other          | HSPA9     | P38646  | 0                      | 1          |
| Other          | HADHA     | P40939  | 0                      | 1          |
| Other          | TUBA1A    | Q71U36  | 0                      | 1          |

Glycoproteins    
  ECM regulators    
  Other  
 Proteoglycans    
 ECM affiliated proteins  
 Collagens    
 Secreted factors

Supplementary Figure 5. Identification of ECM-associated citrullinome of metastasis-bearing livers. **A.** PEAKS® software was utilized to quantify citrullinated peptides in the ECM of CRC hepatic metastases. Citrullinated arginine residues are designated as R(+.98) and marked in red. For illustration, shown are the citrullinated peptides of collagen 6 in the metastasis sample of patient 5. **B.** Tables display the ECM-associated citrullinome of metastasis-bearing livers. Citrullinated peptides were assigned to their corresponding proteins and ranked in accordance with ECM categorization and their abundance in metastasis and adjacent liver groups. Shown are proteins identified as exclusively citrullinated in metastasis (right), or adjacent liver (left), or found citrullinated in both groups (middle). ECM – extracellular matrix.

**A****Human liver metastases and adjacent liver (N=12)**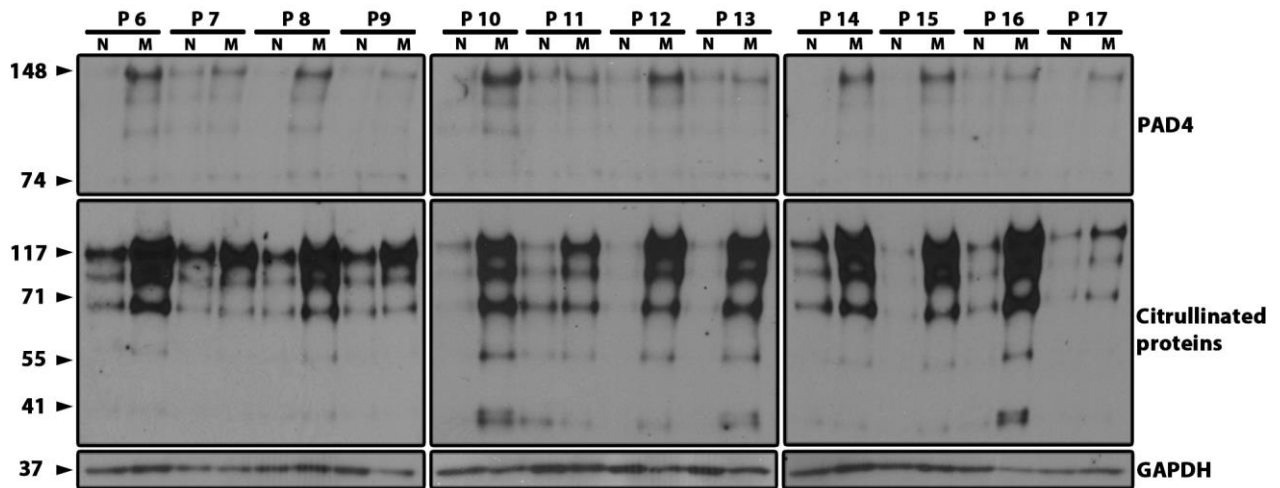**B****Human colon cancer and adjacent colon (N=5)**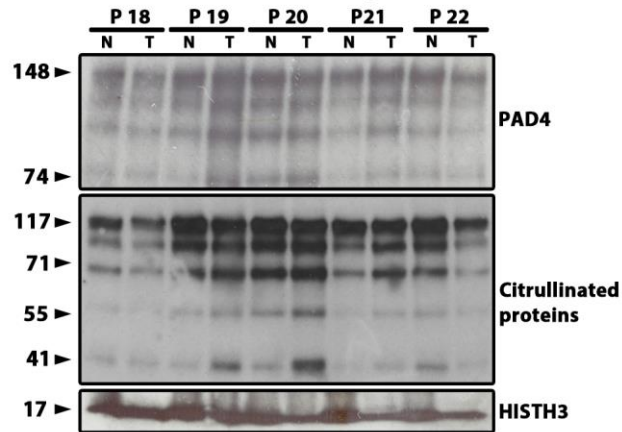**C**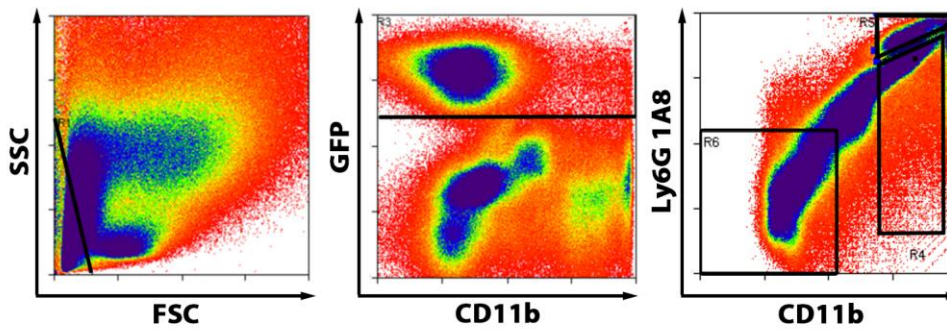**D**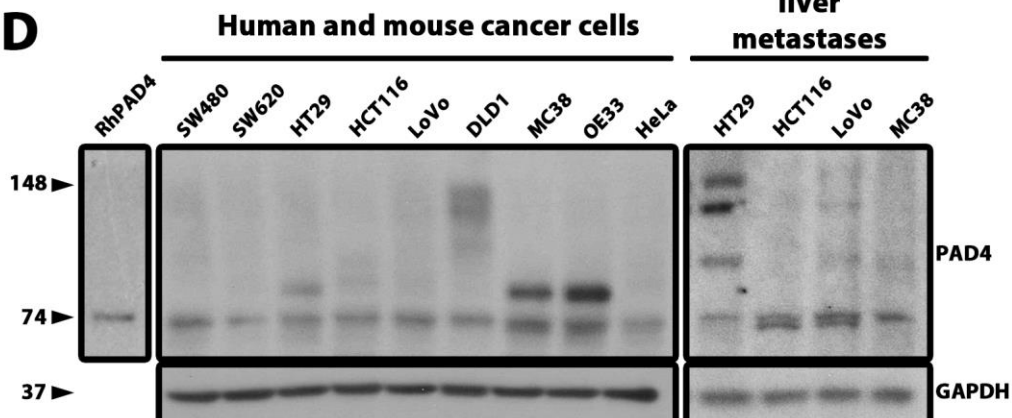

Supplementary Figure 6. Characterization of PAD4 expression and citrullination prevalence in human liver metastases and primary CRC. **A.** Immunoblotting for PAD4 and citrullinated proteins performed on tissue lysates extracted from hepatic metastasis tissues and adjacent unaffected liver tissues ( $n=12$  per group). GAPDH was used as a loading control. **B.** Immunoblotting for PAD4 and citrullinated proteins performed on tissue lysates extracted from primary CRC lesions and adjacent unaffected colon tissues (independent sample of 5 patients). Histone H3 was used as a loading control. **C.** Gating strategy for FACS-sorting of cancer cells (GFP<sup>+</sup>), granulocytes (CD11b<sup>+</sup>Ly6G<sup>hi</sup>), other myeloid cells (CD11b<sup>+</sup>Ly6G<sup>lo</sup>) and the stromal cells (GFP<sup>-</sup>, CD11b<sup>-</sup>, Ly6G<sup>-</sup>) from experimental hepatic metastases. **D.** Immunoblotting for PAD4 performed on cell lysates of indicated human and mouse cancer cell lines and tumor lysates of experimental murine hepatic metastases. GAPDH was used as a loading control. Recombinant human PAD4 was used as a positive control. P – patient, N – adjacent unaffected tissue, M – metastasis, T – primary CRC lesions tissue.

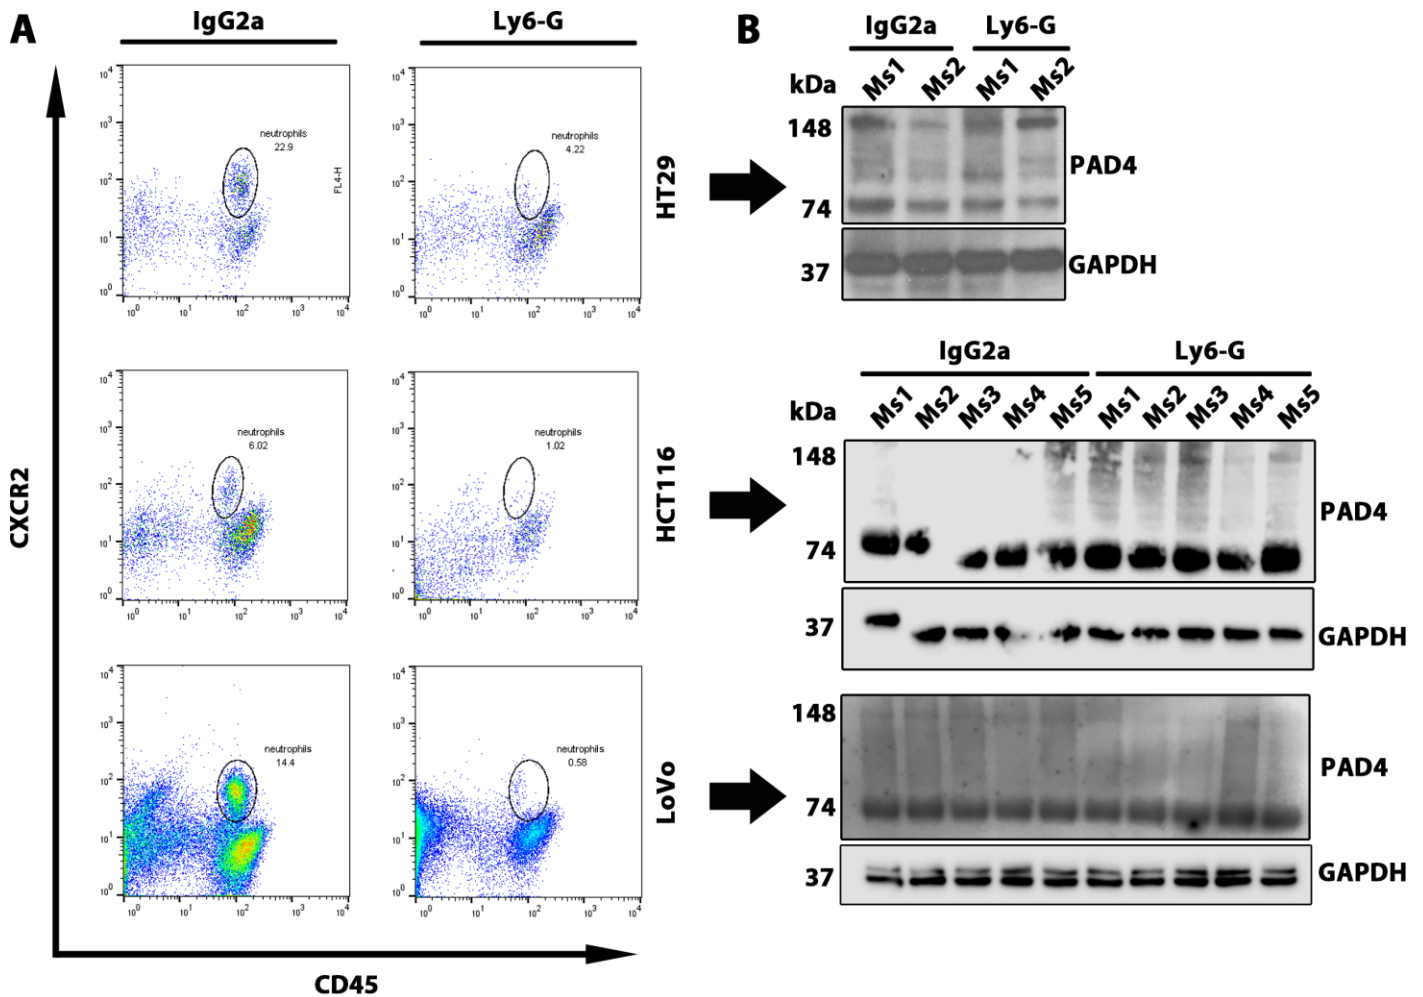

Supplementary Figure 7. Neutrophil depletion of experimental liver metastases does not alter intratumoral levels of PAD4 and/or citrullinated residues. **A**. Total hepatic CD45<sup>+</sup>/CXCR2<sup>+</sup> cell counts in metastasis-bearing mouse livers from animals treated with IgG2a or anti-Ly6G antibody (n=5 biological replicates per group). A representative flow cytometry profile is shown. **B**. Tumor lysates from metastasis-bearing livers from experiment in **A** were probed for PAD4 to examine the effect of neutrophil depletion on intratumoral PAD4 levels (n=5 biological replicates per group, except for HT29, n=2 replicates). Large arrows show corresponding data for each cell line in **A** and **B**. GAPDH was used as a loading control. **C**. ELISA for citrullinated residues in metastasis tissue lysates from experiment in **A** (n=5 biological replicates per group). Error bars indicate range, center values indicate median, box bounds indicate second and third quartiles (n.s. = not significant, Mann-Whitney U test). Ms – mouse, ELISA - the enzyme-linked immunosorbent assay.



Supplementary Figure 8. Investigation of cancer-cell derived EVs and extracellular PAD4. **A.** Whole cell lysates (right) and EVs (left) were collected from cultured HT29, HCT116 and LoVo colon cancer cells and were probed for the indicated markers of extracellular vesicles (positive markers) and Golgi apparatus or endoplasmic reticulum markers (negative markers). GAPDH was used as a loading control. **B.** Serum-free conditioned media was collected from HT29, HCT116 and LoVo cells. EVs were pelleted by centrifugation and supernatant was collected. PAD4 was measured by ELISA in each compartment. **C.** WST-1 proliferation and viability assay was performed in cultured HT29, HCT116 and LoVo colon cancer cells upon the addition of GW4869 ( $n=5$  technical replicates per group). **D.** Representative image of immunostaining for PAD4 and collagen IV in human CRC hepatic metastasis tissue. Scale bar = 100  $\mu\text{m}$ . For **C**, error bars indicate s.e.m. ( $*P < 0.05$ ,  $**P < 0.01$ , n.s. = non-significant, two-way ANOVA). EV – extracellular vesicles, ER – endoplasmic reticulum, SD – standard deviation.

**A**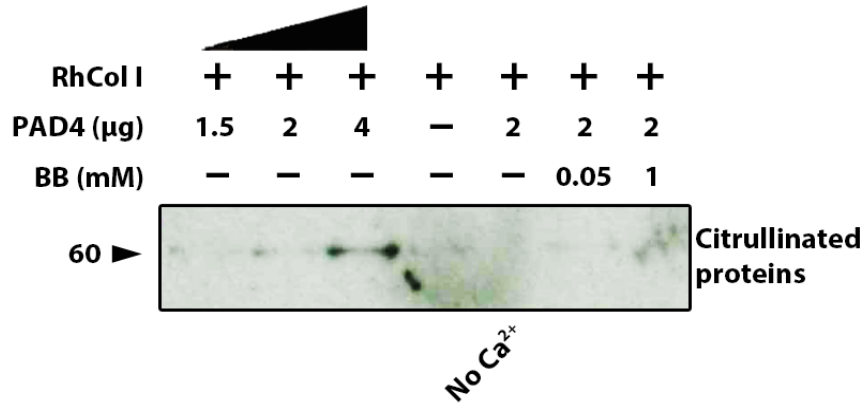**B**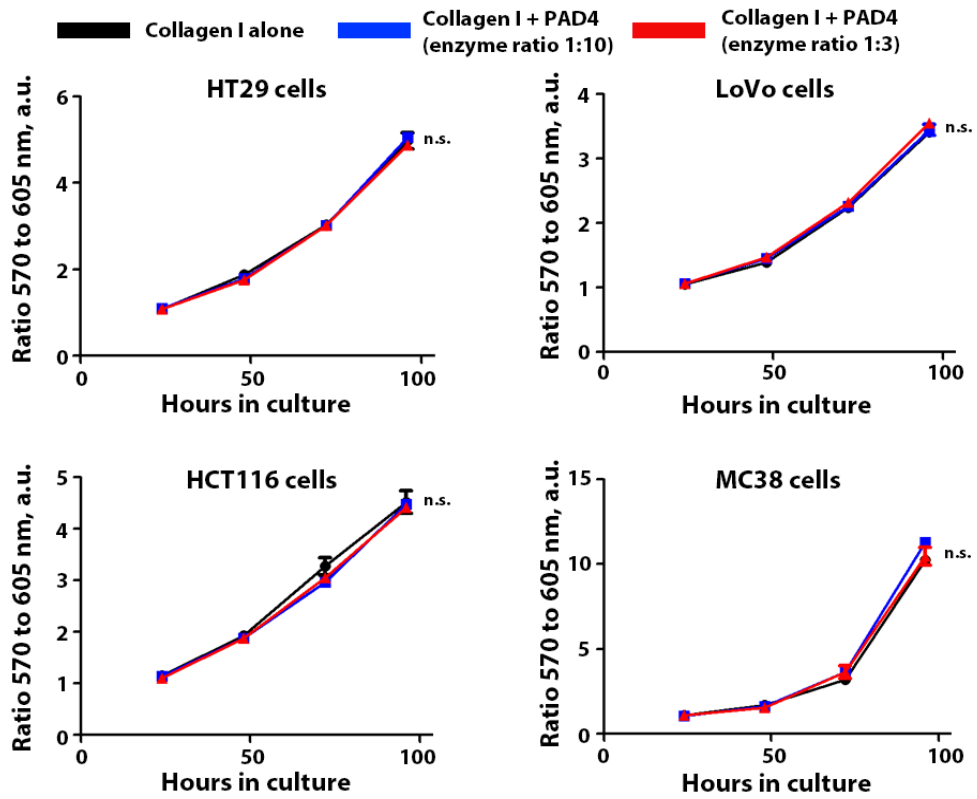**C**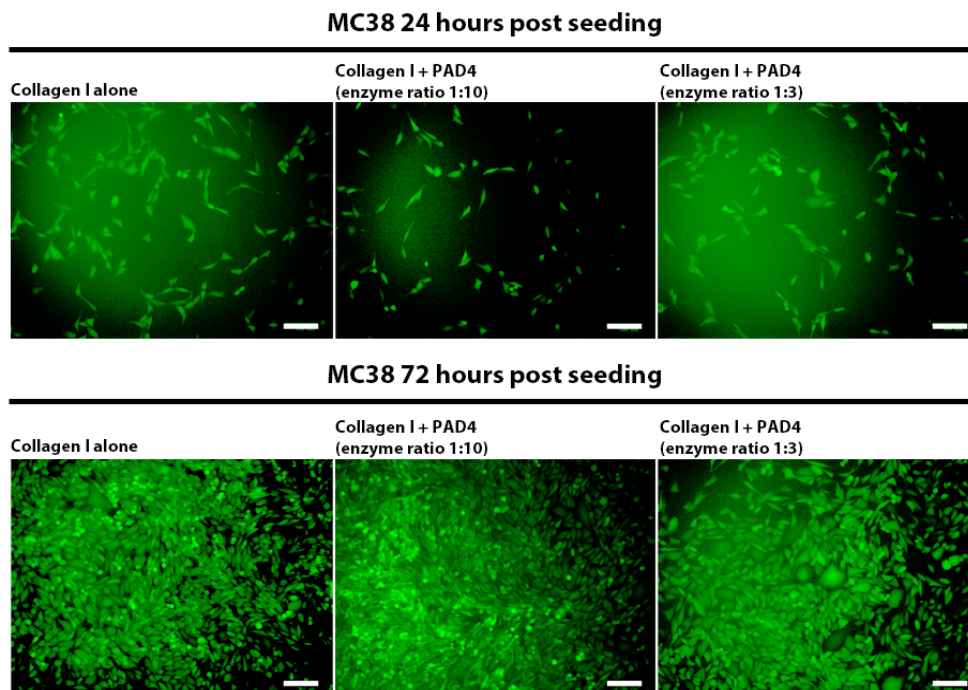



Supplementary Figure 9. Citrullination of collagen I does not affect proliferation or viability of CRC cells. **A.** Collagen type I pre-treated with recombinant PAD4 (ascending concentration) or collagen I pre-treated with recombinant PAD4 and BB-Cl-amidine (ascending concentration) were subjected to immunoblotting for citrullinated proteins. Negative controls were recombinant collagen type I alone or depletion of Ca<sup>2+</sup> in the experimental group. Experiment was performed two times. **B.** Cancer cells were plated in wells pre-coated with either recombinant collagen I alone, or collagen I with added recombinant PAD4 with ascending enzyme-to-substrate ratios (1:10 and 1:3) (n=5-7 technical replicates per group). At time points 24, 48, 72 and 96 h cells were examined with Cell Cytotoxicity Assay Kit (ab112118). **C.** Representative images of GFP<sup>+</sup> MC38 cells from **B**. Scale bar = 100 μm. Error bars indicate s.e.m. (n.s. = non-significant, two-way ANOVA). BB – BB-Cl-amidine.

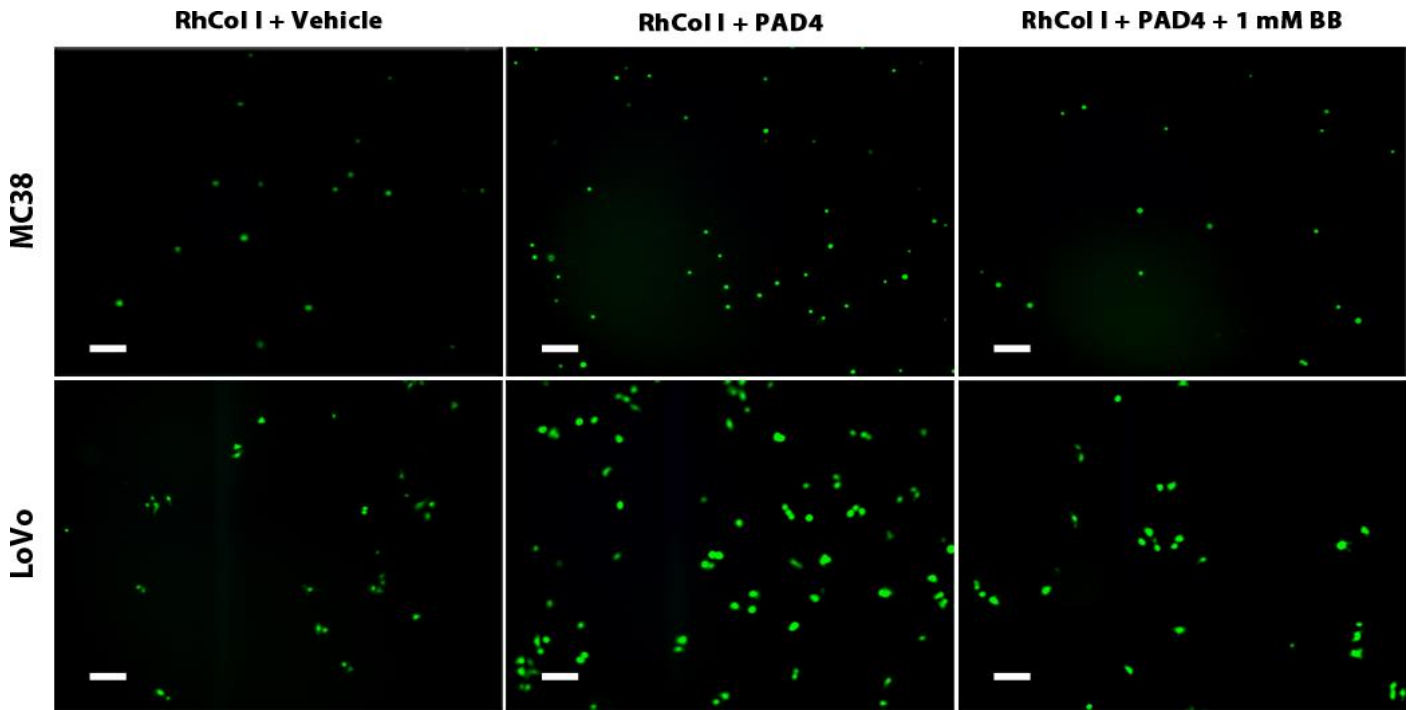

Supplementary Figure 10. Citrullination of collagen I alters adhesion of CRC cells. GFP<sup>+</sup> cancer cells were plated in wells pre-coated with either recombinant collagen I alone, or collagen I with added recombinant PAD4, or collagen I with the addition of PAD4 and BB-CI-amidine. Cells were imaged using an epifluorescence microscope. At least 5 fields of view per condition were taken. Shown are representative images of cells. Scale bar = 100  $\mu$ m.

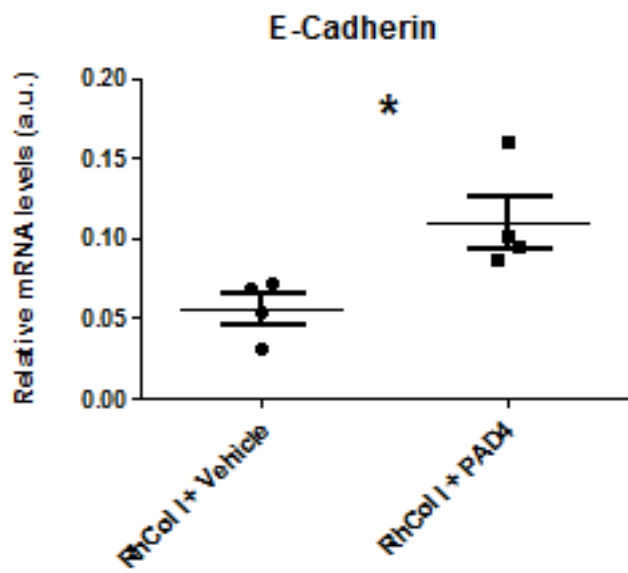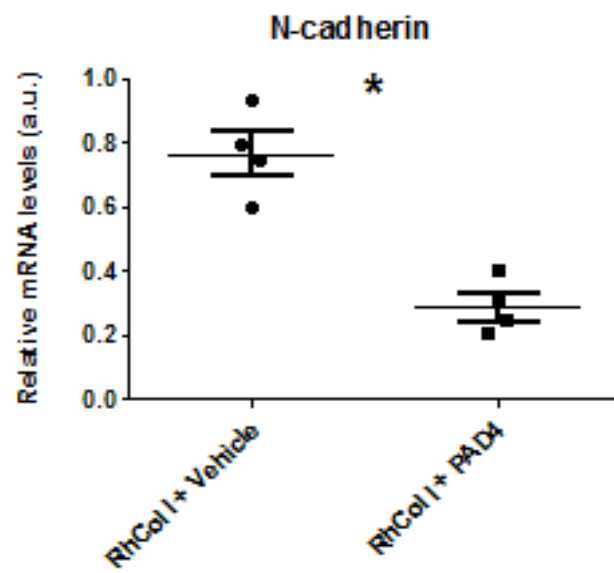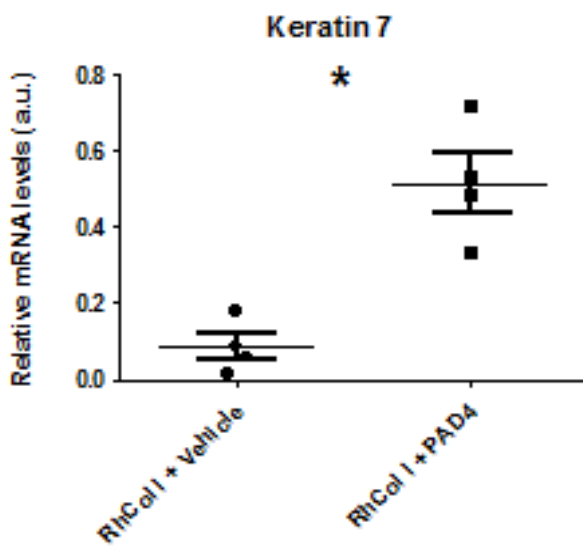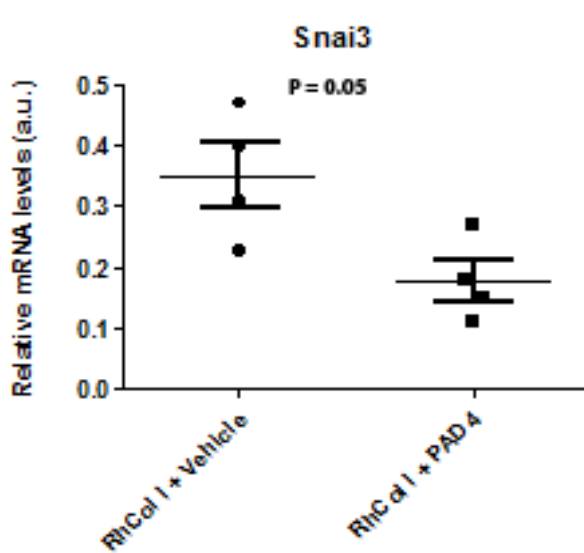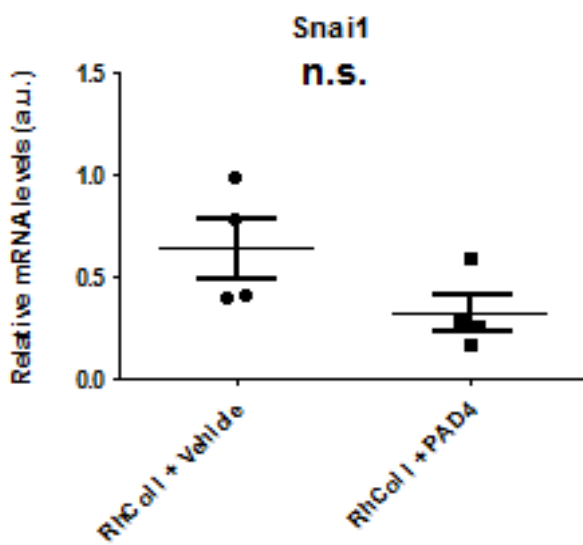

Supplementary Figure 11. Relative (to HPRT) mRNA expression of selected EMT genes in LoVo cells seeded on collagen type I pre-treated with recombinant PAD4 as compared to those seeded on intact collagen type I (n=4 technical replicates per group). Throughout, \* $P < 0.05$ , n.s. = non-significant, Mann-Whitney U test.

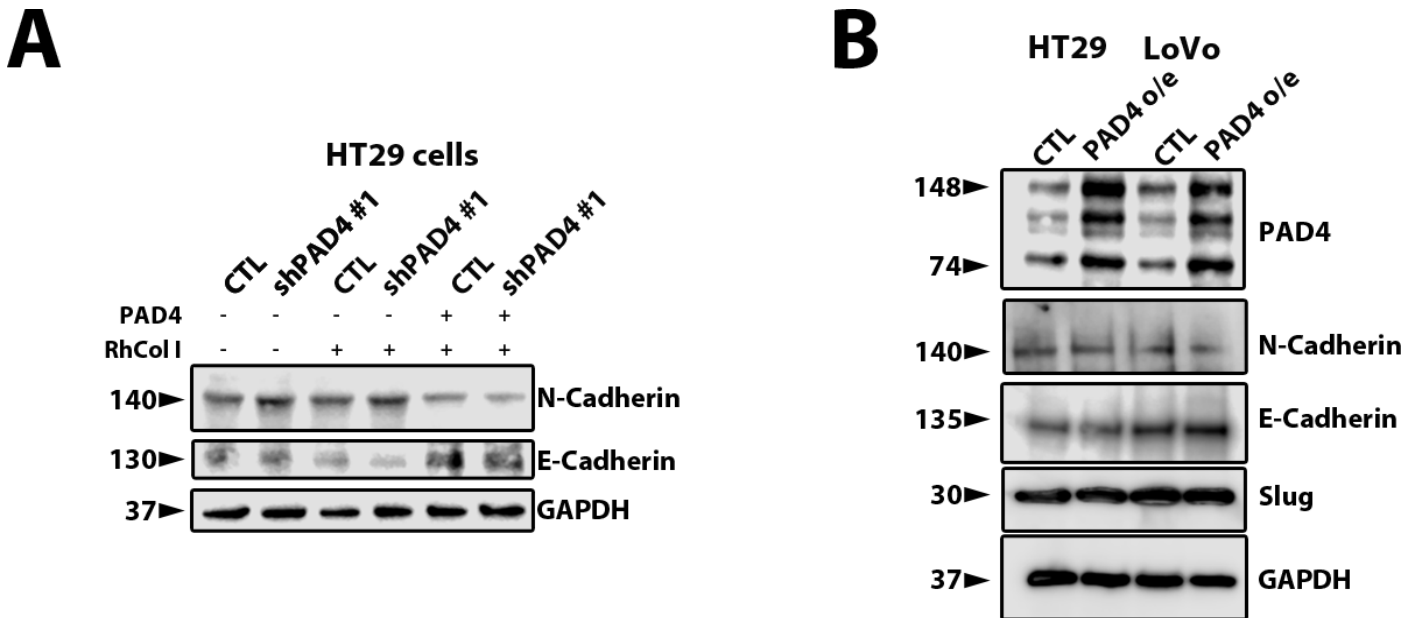

Supplementary Figure 12. Changes in epithelial-mesenchymal plasticity require extracellular but not intracellular citrullination. **A.** Control and PAD4-deficient HT29 cells were plated on recombinant collagen type I that had been previously incubated with recombinant PAD4 or vehicle as indicated. Cells were collected and probed for the indicated proteins. GAPDH was used as a loading control. **B.** Immunoblotting for indicated proteins in HT29 and LoVo cells transfected with empty vector (CTL) or PAD4-overexpressing lentivirus particles (PAD4 o/e). GAPDH was used as a loading control. CTL – control, shPAD4 – PAD4 knockdown.

Fig3E

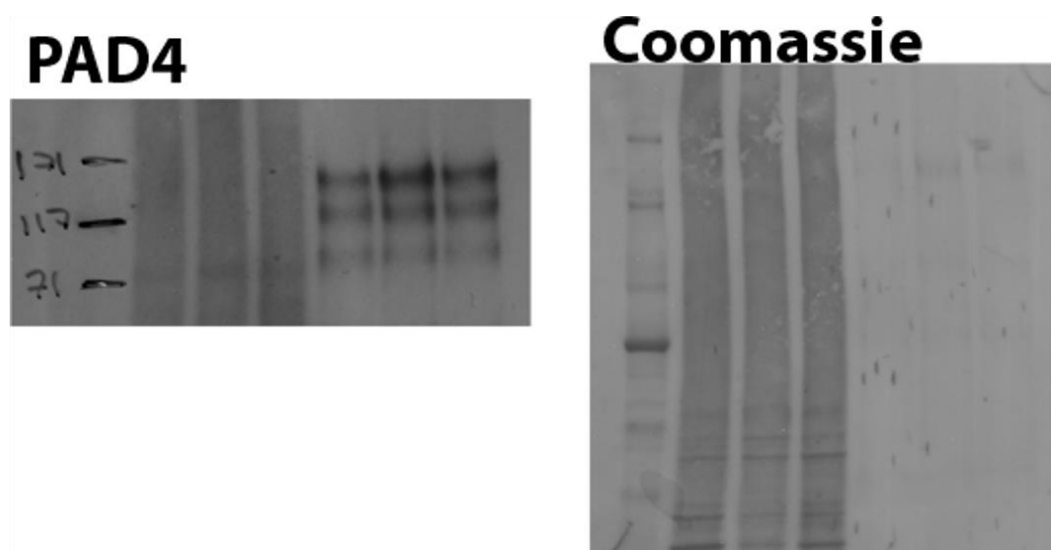

Supplementary Figure 13

Fig3G

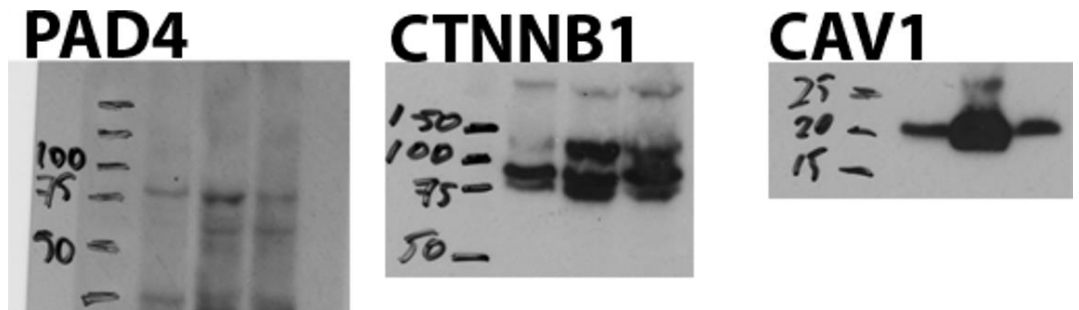

Supplementary Figure 13 (continued)

Fig3I

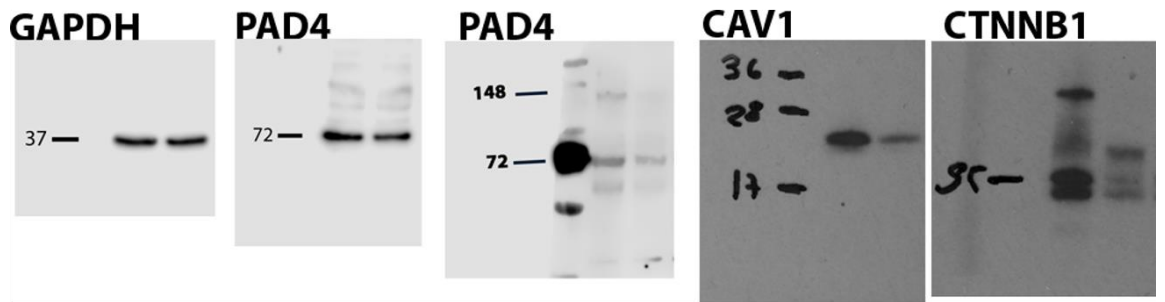

Supplementary Figure 13 (continued)



Fig4F

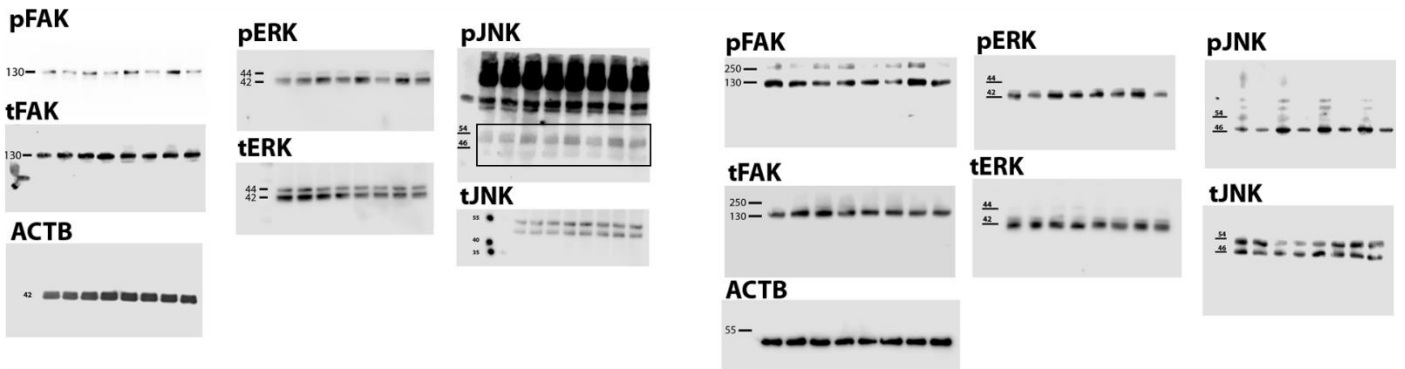

Supplementary Figure 13 (continued)

Fig4H

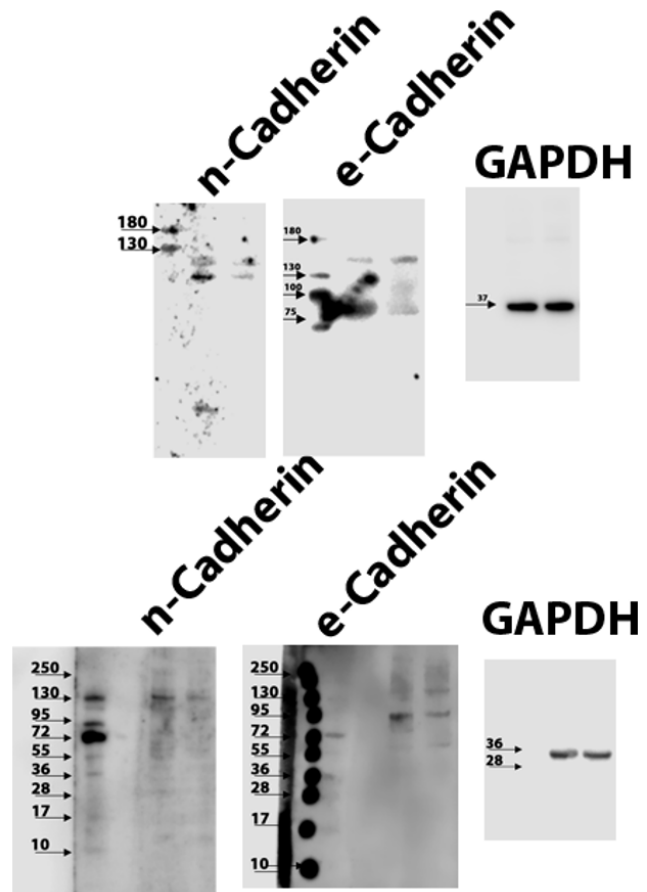

Supplementary Figure 13 (continued)

Fig5A,B

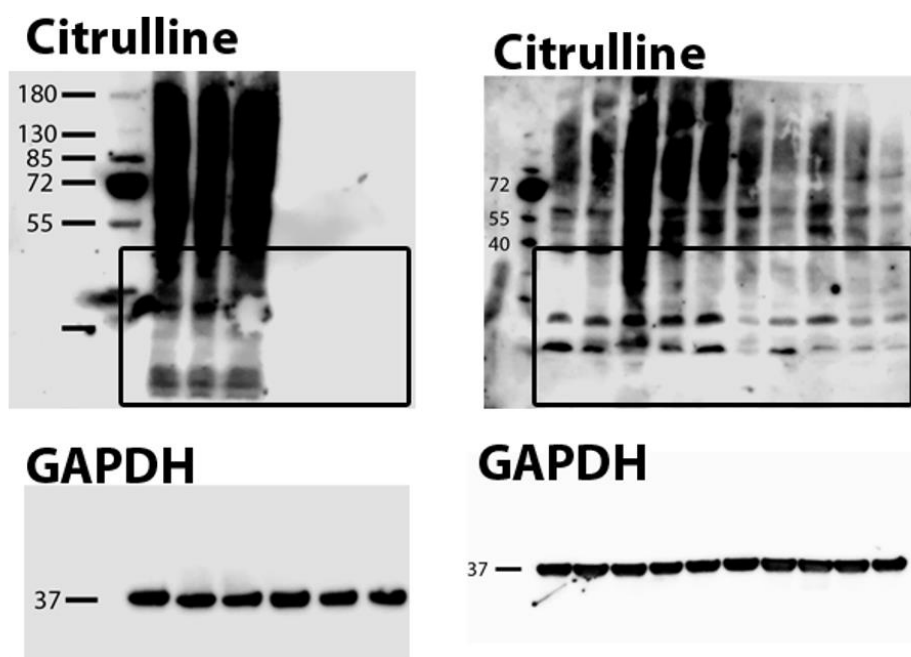

Supplementary Figure 13 (continued)

Fig6A

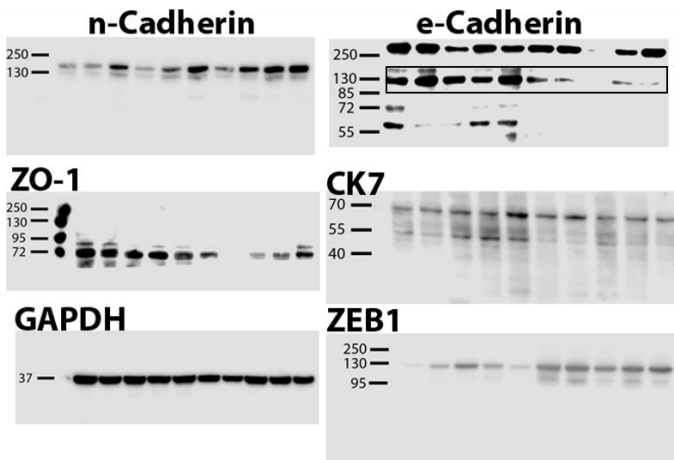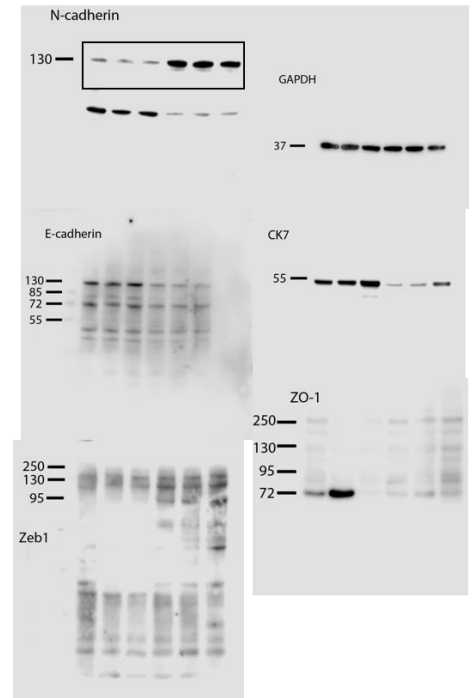

Supplementary Figure 13 (continued)

Fig6D

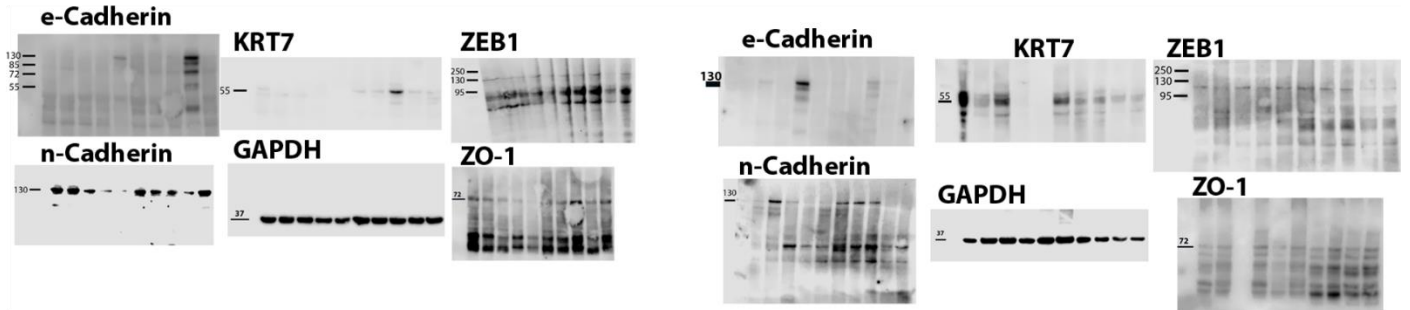

Supplementary Figure 13 (continued)

Fig7A,B

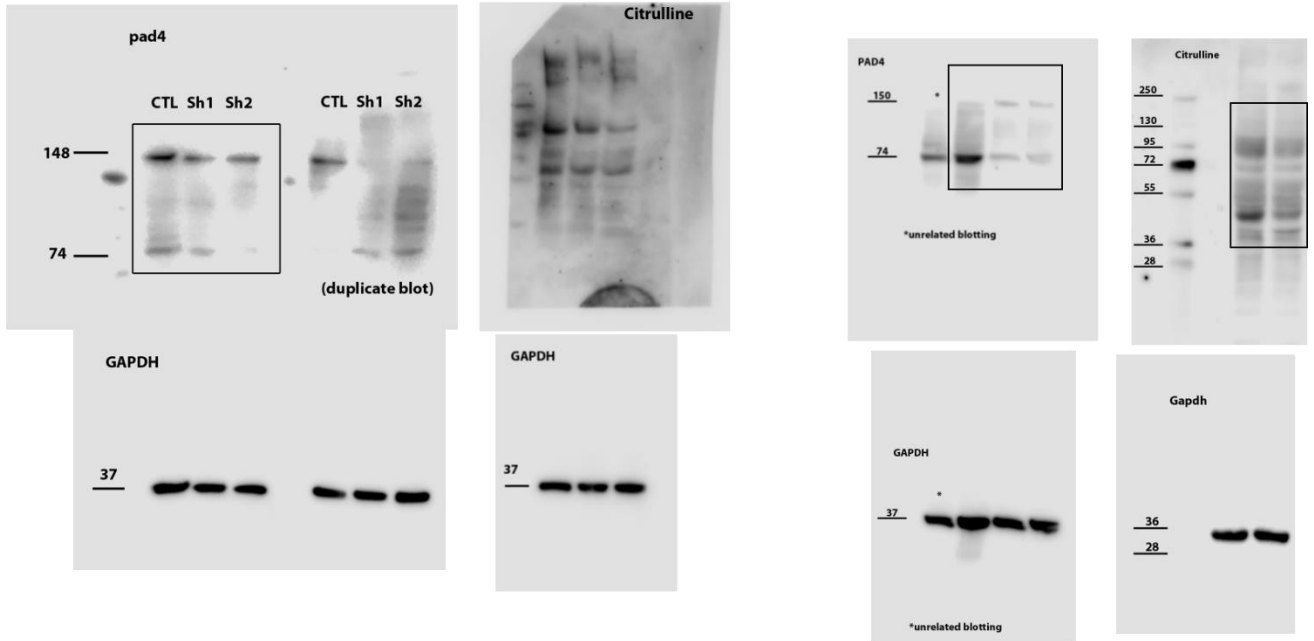

Supplementary Figure 13 (continued)

Fig7E

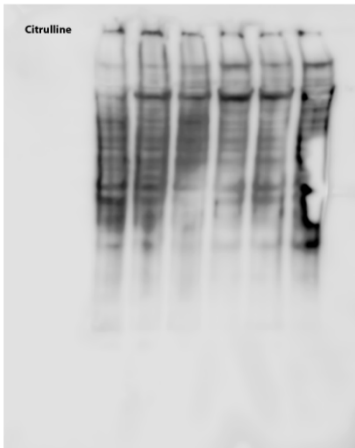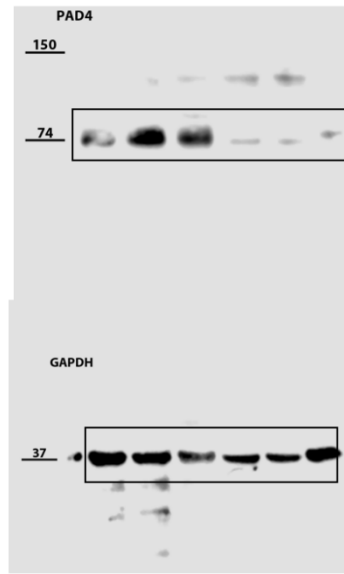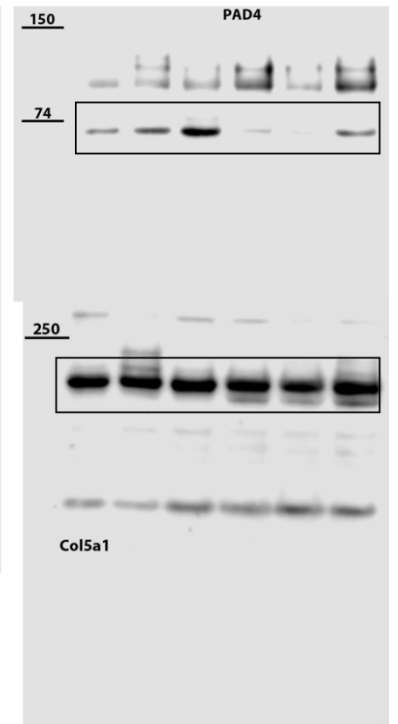

Supplementary Figure 13 (continued)

SFig4A

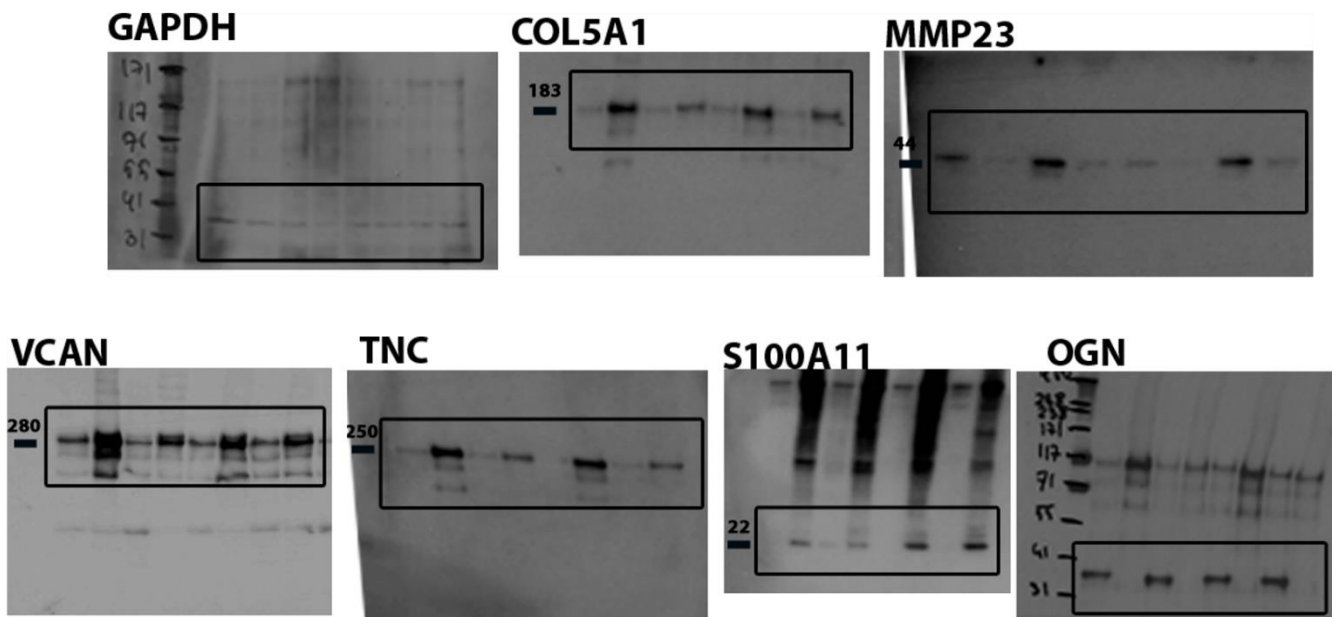

Supplementary Figure 13 (continued)



# SFig6A,B

## PAD4

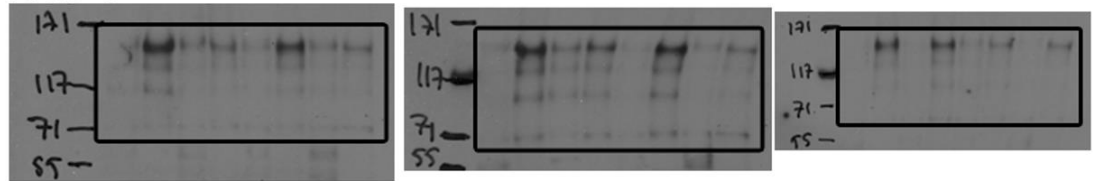

## GAPDH

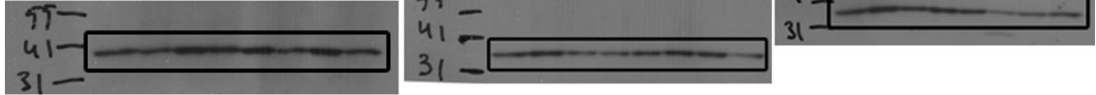

## PAD4

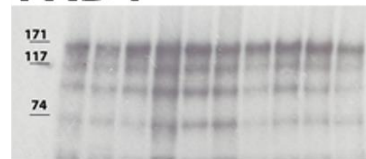

## HISTH3

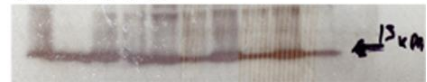

Supplementary Figure 13 (continued)

SFig6D

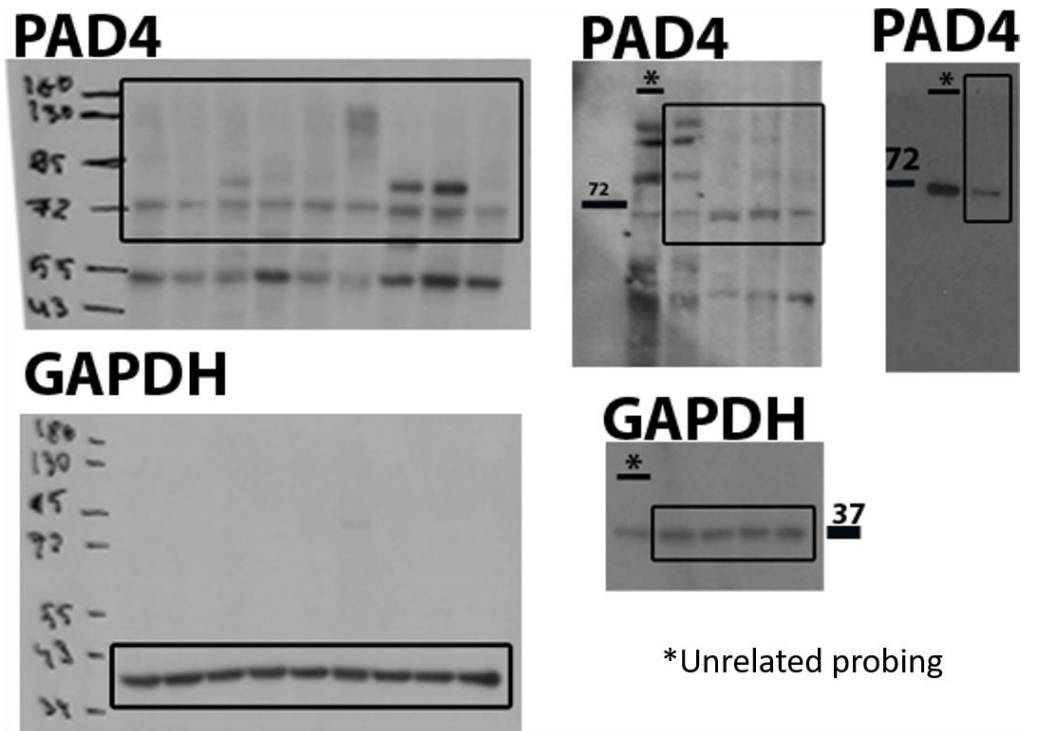

Supplementary Figure 13 (continued)

# SFig7B

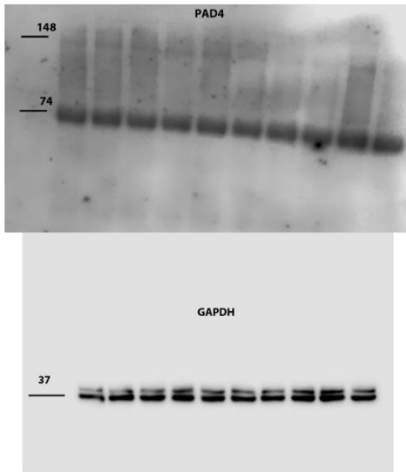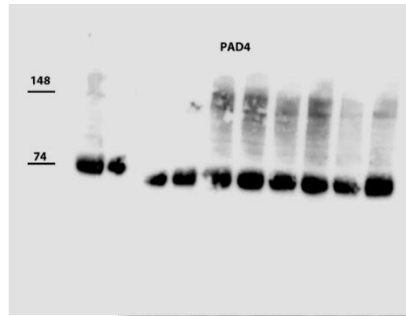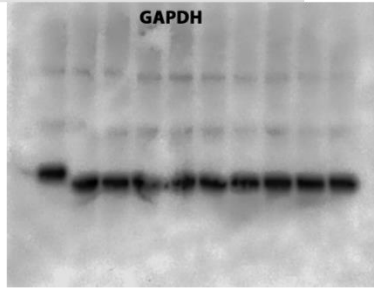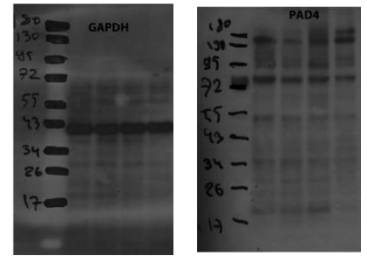

Supplementary Figure 13 (continued)

# SFig8A (1)

Original WB  
TSG101 WCL  
PDI WCL & Exo  
GM130 WCL & Exo  
CD9 WCL & Exo  
Taken from here

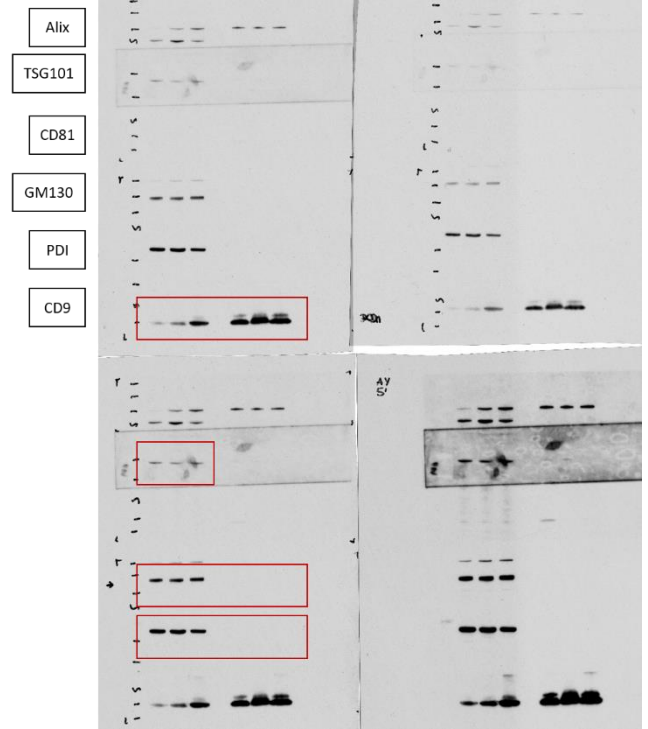

Supplementary Figure 13 (continued)

# SFig8A (2)

Original WB  
CD81 WCL & Exo  
TSG101 Exo  
Taken from here

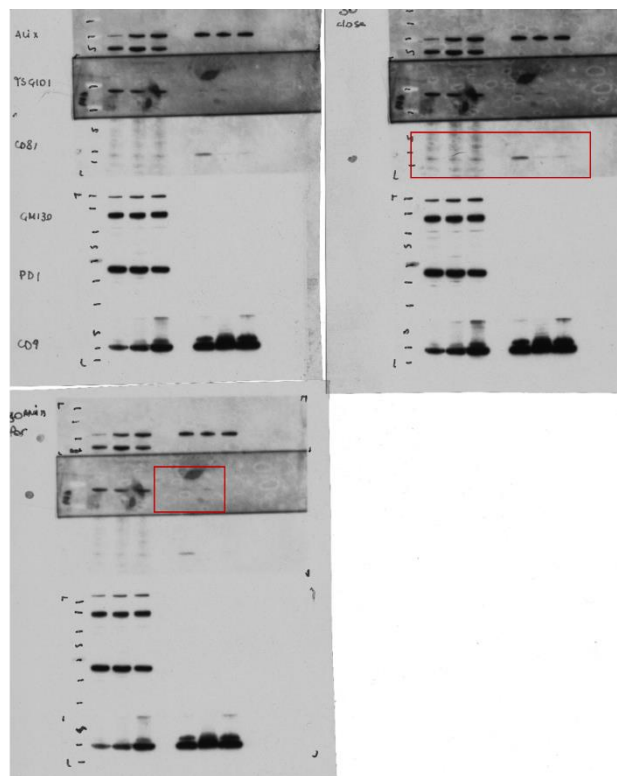

Supplementary Figure 13 (continued)

# SFig8A (3)

Original WB  
CD63 WCL & Exo  
GAPDH WCL  
Taken from here

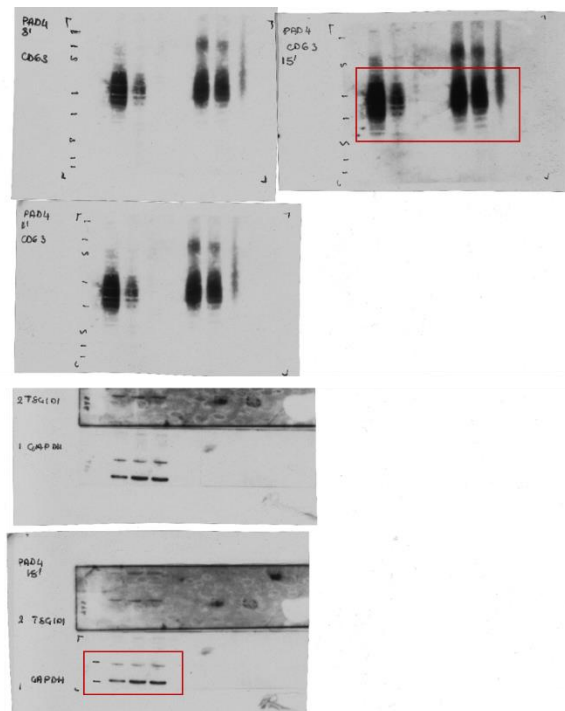

Supplementary Figure 13 (continued)

FigS10A

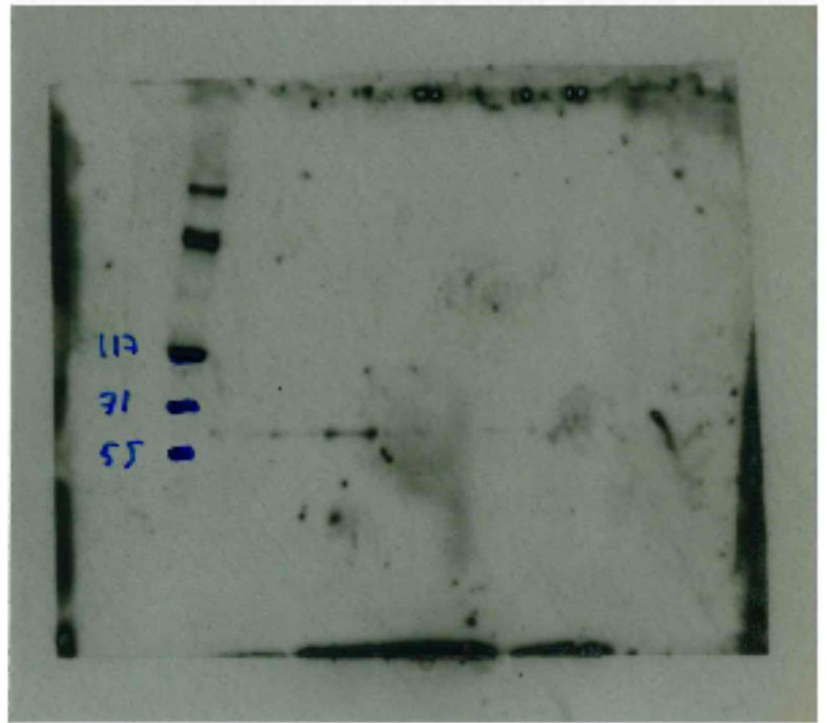

Supplementary Figure 13 (continued)

# SFig11A

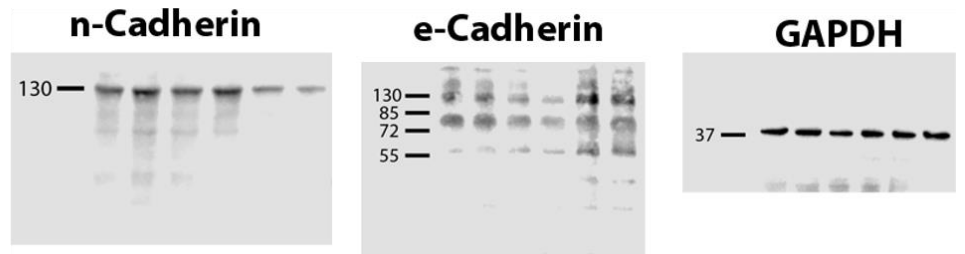

Supplementary Figure 13 (continued)



# SFig11B

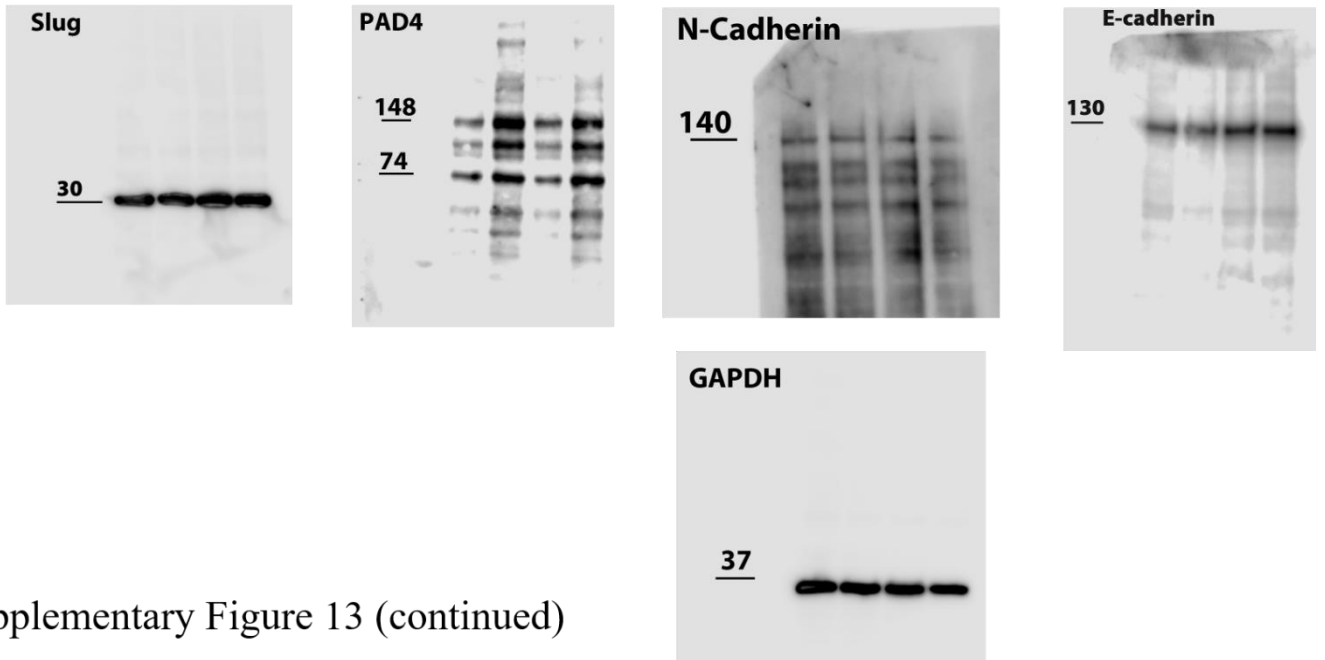

Supplementary Figure 13 (continued)
