# Supplementary material for: Colorectal cancer liver metastatic growth depends on PAD4-driven citrullination of the extracellular matrix
Source: PubMed Central journal article supplement (PMC6235861; doi:10.1038/s41467-018-07306-7), 2018-11-14
Supplement: 41467_2018_7306_MOESM3_ESM.pdf [file 41467_2018_7306_MOESM3_ESM.pdf]

### **Description of Additional Supplementary Files**

File Name: Supplementary Data 1

Description: Qualitative proteomics analysis of the matrisome of human liver metastasis

File Name: Supplementary Data 2

Description: Quantitative label-free proteomics analysis of the matrisome of human liver metastasis

File Name: Supplementary Data 3.

Description: Identification of the citrullinome of human liver metastasis ECM

File Name: Supplementary Data 4

Description: List of antibodies used in the study
